# Supplementary material for: Developmental Auditory and Speech–Language Performance in Pediatric Cochlear Implantation Recipients with Stable White Matter Lesions
Source: MDPI journal article supplement (doi:10.3390/brainsci13111540), 2023-11-01
Supplement: s1 [file s1]

**Supplemental Table S1.** Categories of auditory performance (CAPs) criteria

| Criteria                                                 | Category |
|----------------------------------------------------------|----------|
| No awareness of environmental sounds                     | 0        |
| Awareness of environmental sounds                        | 1        |
| Response to speech sounds                                | 2        |
| Identification of environmental sounds                   | 3        |
| Discrimination of some speech sounds without lip-reading | 4        |
| Understanding of common phrases without lip-reading      | 5        |
| Understanding of conversation without lip-reading        | 6        |
| Use of telephone with known listener                     | 7        |

**Supplemental Table S2.** Speech intelligibility rating (SIR) criteria

| Criteria                                                                                                                            | Category |
|-------------------------------------------------------------------------------------------------------------------------------------|----------|
| Connected speech is unintelligible. Pre-recognisable words in spoken language, primary mode of communication may be manual          | 1        |
| Connected speech is unintelligible. Intelligible speech develops in single words when contextual and lip-reading cues are available | 2        |
| Connected speech is intelligible to a listener who concentrates and lip-reads                                                       | 3        |
| Connected speech is intelligible to a listener who has a little experience of a deaf person's speech                                | 4        |
| Connected speech is intelligible to all listeners. Child is understood easily in everyday contexts                                  | 5        |

**Supplemental Table S3.** Outcomes at 1, 12, and 24 months post-CI in cases with Fazekas scores of 6 (case-12, 42) and 5 (case-5, 8, 15, 36)

| Case Number          | age at CI (y) | months post-CI | Mandarin Chinese speech recognition(%) |            |                | CAP | SIR |
|----------------------|---------------|----------------|----------------------------------------|------------|----------------|-----|-----|
|                      |               |                | tone                                   | disyllable | short sentence |     |     |
| case-12 <sup>a</sup> | 3.8           | 1              | 0                                      | 0          | 0              | 2   | 1   |
|                      |               | 12             | 75                                     | 100        | 95             | 4   | 3   |
|                      |               | 24             | 100                                    | 100        | 100            | 7   | 5   |
| case-42              | 3.1           | 6              | 45                                     | 43         | 45             | 2   | 1   |
|                      |               | 12             | 60                                     | 47         | 45             | 3   | 1   |
|                      |               | 24             | 80                                     | 66         | 80             | 4   | 2   |
| case-5 <sup>b</sup>  | 6.8           | 1              | 40                                     | 43         | 5              | 1   | 1   |
|                      |               | 12             | 50                                     | 87         | 70             | 3   | 3   |
|                      |               | 24             | 55                                     | 80         | 85             | 3   | 3   |
| case-8 <sup>c</sup>  | 5.7           | 1              | 55                                     | 65         | 65             | 2   | 1   |
|                      |               | 12             | 98                                     | 100        | 95             | 2   | 1   |
|                      |               | 24             | 100                                    | 100        | 100            | 2   | 2   |
| case-15              | 3.4           | 1              | 0                                      | 7          | 0              | 3   | 2   |
|                      |               | 12             | 100                                    | 100        | 100            | 4   | 3   |
|                      |               | 24             | 100                                    | 100        | 100            | 4   | 4   |
| case-36 <sup>d</sup> | 2.9           | 1              | 10                                     | 0          | 0              | 1   | 1   |
|                      |               | 12             | 80                                     | 83         | 75             | 4   | 2   |
|                      |               | 24             | 100                                    | 100        | 95             | 5   | 4   |

<sup>a</sup> the MRI is showed in Figure 1(B), <sup>b</sup> the MRI is showed in Figure 3(D), <sup>c</sup> the MRI is showed in Figure 2(C), <sup>d</sup> the MRI is showed in Figure 2(D)

Abbreviations: CAP: category of auditory performance, CI: cochlear implantation, SIR: speech intelligibility rate

**Supplemental Table S4.** Outcomes at 24 months post-CI in children with and without temporal lobe involvement

| Variable                 |                | temporal lobe involvement |                | <i>p</i> <sup>a</sup> |
|--------------------------|----------------|---------------------------|----------------|-----------------------|
|                          |                | positive(n=10)            | negative(n=33) |                       |
| speech                   | tone           | 92 (78, 100)              | 100 (74, 100)  | 0.738                 |
| recognition <sup>b</sup> | disyllable     | 95 (80, 100)              | 100 (85, 100)  | 0.640                 |
| (%)                      | short sentence | 83 (79, 96)               | 100 (75, 100)  | 0.286                 |
| CAP <sup>b</sup>         |                | 5, (4, 5)                 | 5, (4, 6)      | 0.402                 |
| SIR <sup>b</sup>         |                | 4, (3, 5)                 | 4, (3, 5)      | 0.921                 |

<sup>a</sup> By Mann Whitney U test, <sup>b</sup> Median (25<sup>th</sup>, 75<sup>th</sup> percentile)

Abbreviations: CAP: category of auditory performance, CI: cochlear implantation, SIR: speech intelligibility rate.
